# Supplementary material
Source: publisher figshare collection journal article supplement (https://acs.figshare.com/ndownloader/files/3895426)
Supplement: Supplementary file 1 [file 3895426]

data_global
_audit_creation_method                  'APEX2 v2010.9-1'

_publ_requested_journal                 'Inorganic Chemistry'

_publ_contact_author_name               'Anne K. Jones'
_publ_contact_author_address            
;
Department of Chemistry and Biochemistry
Arizona State University
Tempe, AZ  85287-1604
;
_publ_contact_author_email              'Anne.Katherine.Jones@asu.edu'
_publ_contact_author_fax                '480-965-2747'
_publ_contact_author_phone              '480-965-0356'

_publ_section_title                     
;
;

loop_
_publ_author_name
_publ_authon_footnote
_publ_author_address
'Souvik Roy'
.
;
Department of Chemistry and Biochemistry, Arizona State University, Tempe, AZ 
85287-1604, USA
;

'Shobeir K. S. Mazinani'
.
;
Department of Chemistry and Biochemistry, Arizona State University, Tempe, AZ 
85287-1604, USA
;

'Thomas L. Groy'
.
;
Department of Chemistry and Biochemistry, Arizona State University, Tempe, AZ 
85287-1604, USA
;

'Tarakeshwar Pilarisetty'
.
;
Department of Chemistry and Biochemistry, Arizona State University, Tempe, AZ 
85287-1604, USA
;

'Vladimiro Mujica'
.
;
Department of Chemistry and Biochemistry, Arizona State University, Tempe, AZ 
85287-1604, USA
;

'Anne K. Jones'
.
;
Department of Chemistry and Biochemistry, Arizona State University, Tempe, AZ 
85287-1604, USA
;


_publ_section_abstract                  
;
;
_publ_section_references                
;
;
_publ_section_comment                   
;
;

data_dppfP2FeCObdt
_chemical_name_systematic               ?
_chemical_name_common                   ?
_chemical_formula_moiety                'C41 H32 Fe2 O P2 S2'
_chemical_formula_sum                   'C41 H32 Fe2 O P2 S2'
_chemical_formula_iupac                 ?
_chemical_formula_weight                778.43

_chemical_melting_point                 ?

_space_group_crystal_system             monoclinic
_space_group_name_H-M_alt               'P 1 21/n 1'
_space_group_name_Hall                  '-P 2yn'
loop_
    _space_group_symop_operation_xyz
    'x, y, z'
    '-x+1/2, y+1/2, -z+1/2'
    '-x, -y, -z'
    'x-1/2, -y-1/2, z-1/2'

_cell_length_a                          9.7375(6)
_cell_length_b                          20.8536(13)
_cell_length_c                          16.8851(11)
_cell_angle_alpha                       90
_cell_angle_beta                        95.2680(10)
_cell_angle_gamma                       90
_cell_volume                            3414.2(4)
_cell_formula_units_Z                   4
_cell_measurement_reflns_used           6484
_cell_measurement_theta_min             2.2984
_cell_measurement_theta_max             25.2509
_cell_measurement_temperature           123.(2)

_exptl_crystal_description              plate
_exptl_crystal_colour                   'clear dark red'
_exptl_crystal_size_max                 0.360
_exptl_crystal_size_mid                 0.150
_exptl_crystal_size_min                 0.050
_exptl_crystal_density_diffrn           1.514
_exptl_crystal_density_meas             ?
_exptl_crystal_density_method           'not measured'
_exptl_crystal_F_000                    1600

_exptl_absorpt_coefficient_mu           1.100
_exptl_absorpt_correction_type          multi-scan
_exptl_absorpt_process_details          
    'SADABS Version 2008/1 (Bruker AXS, 2008)'
_exptl_absorpt_correction_T_min         0.78
_exptl_absorpt_correction_T_max         0.95

_exptl_special_details                  
;
; 

_diffrn_ambient_temperature             123.(2)

_diffrn_source                          ?
_diffrn_source_type                     'sealed tube'

_diffrn_radiation_type                  MoK\a
_diffrn_radiation_wavelength            0.71073
_diffrn_radiation_monochromator         graphite

_diffrn_measurement_device_type         'Bruker Smart APEX'
_diffrn_measurement_method              '\w and \f scans'

_diffrn_detector_area_resol_mean        8.3330

_diffrn_reflns_number                   27387
_diffrn_reflns_av_R_equivalents         0.0470
_diffrn_reflns_av_sigmaI/netI           0.0379
_diffrn_reflns_theta_min                1.95
_diffrn_reflns_theta_max                25.35
_diffrn_reflns_theta_full               25.35
_diffrn_measured_fraction_theta_max     1.000
_diffrn_measured_fraction_theta_full    1.000
_diffrn_reflns_limit_h_min              -11
_diffrn_reflns_limit_h_max              11
_diffrn_reflns_limit_k_min              -25
_diffrn_reflns_limit_k_max              25
_diffrn_reflns_limit_l_min              -20
_diffrn_reflns_limit_l_max              20

_refine_special_details                 
;
Refinement of F^2^ against ALL reflections.  The weighted R-factor wR and
goodness of fit S are based on F^2^, conventional R-factors R are based
on F, with F set to zero for negative F^2^. The threshold expression of
F^2^ > 2sigma(F^2^) is used only for calculating R-factors(gt) etc. and is
not relevant to the choice of reflections for refinement.  R-factors based
on F^2^ are statistically about twice as large as those based on F, and R-
factors based on ALL data will be even larger.
;

_reflns_number_total                    6255
_reflns_number_gt                       4982
_reflns_threshold_expression            >2sigma(I)

_refine_ls_structure_factor_coef        Fsqd
_refine_ls_matrix_type                  full
_refine_ls_R_factor_all                 0.0460
_refine_ls_R_factor_gt                  0.0296
_refine_ls_wR_factor_gt                 0.0653
_refine_ls_wR_factor_ref                0.0714
_refine_ls_goodness_of_fit_ref          1.019
_refine_ls_restrained_S_all             1.019
_refine_ls_number_reflns                6255
_refine_ls_number_parameters            433
_refine_ls_number_restraints            0
_refine_ls_hydrogen_treatment           constr
_refine_ls_weighting_scheme             calc
_refine_ls_weighting_details
    'calc w=1/[\s^2^(Fo^2^)+(0.0314P)^2^+1.6727P] where P=(Fo^2^+2Fc^2^)/3'

_atom_sites_solution_hydrogens          geom
_atom_sites_solution_primary            direct
_atom_sites_solution_secondary          difmap

_refine_ls_shift/su_max                 0.001
_refine_ls_shift/su_mean                0.000
_refine_diff_density_max                0.443
_refine_diff_density_min                -0.303
_refine_ls_extinction_method            none
_refine_ls_extinction_coef              ?

loop_
    _atom_type_symbol
    _atom_type_description
    _atom_type_scat_dispersion_real
    _atom_type_scat_dispersion_imag
    _atom_type_scat_source
    C C 0.0033 0.0016 'International Tables Vol C Tables 4.2.6.8 and 6.1.1.4'
    H H 0.0000 0.0000 'International Tables Vol C Tables 4.2.6.8 and 6.1.1.4'
    O O 0.0106 0.0060 'International Tables Vol C Tables 4.2.6.8 and 6.1.1.4'
    P P 0.1023 0.0942 'International Tables Vol C Tables 4.2.6.8 and 6.1.1.4'
    S S 0.1246 0.1234 'International Tables Vol C Tables 4.2.6.8 and 6.1.1.4'
    Fe Fe 0.3463 0.8444
     'International Tables Vol C Tables 4.2.6.8 and 6.1.1.4'

_computing_data_collection              
    'Bruker Instrument Service v2010, 9, 0, 0 (Bruker AXS, 2010)'
_computing_cell_refinement              'SAINT V7.68A (Bruker AXS, 2009)'
_computing_data_reduction               'SAINT V7.68A (Bruker AXS, 2009)'
_computing_structure_solution           'SHELXS-97 (Sheldrick, 2008)'
_computing_structure_refinement         'SHELXL-97 (Sheldrick, 2008)'
_computing_molecular_graphics           'XShell ver. 6.3.1 (Bruker AXS, 2004)'
_computing_publication_material         
    'Bruker APEX2 v2010.9-1 (Bruker AXS, 2010)'

loop_
    _atom_site_type_symbol
    _atom_site_label
    _atom_site_fract_x
    _atom_site_fract_y
    _atom_site_fract_z
    _atom_site_U_iso_or_equiv
    _atom_site_adp_type
    _atom_site_calc_flag
    _atom_site_refinement_flags
    _atom_site_occupancy
    _atom_site_disorder_assembly
    _atom_site_disorder_group
    Fe Fe1 0.67316(3) 0.234302(15) 0.754099(19) 0.01485(9) Uani d . 1 . .
    Fe Fe2 0.33804(3) 0.319179(15) 0.607433(19) 0.01662(9) Uani d . 1 . .
    S S1 0.88983(6) 0.25942(3) 0.77564(4) 0.01817(13) Uani d . 1 . .
    S S2 0.72470(6) 0.13468(3) 0.79345(4) 0.01958(14) Uani d . 1 . .
    P P1 0.63704(6) 0.33905(3) 0.73121(4) 0.01600(14) Uani d . 1 . .
    P P2 0.56309(6) 0.19141(3) 0.64556(3) 0.01445(13) Uani d . 1 . .
    O O1 0.45243(19) 0.23053(8) 0.85729(11) 0.0300(4) Uani d . 1 . .
    C C1 0.9762(2) 0.19140(11) 0.81435(14) 0.0180(5) Uani d . 1 . .
    C C2 0.8996(2) 0.13542(11) 0.82441(14) 0.0194(5) Uani d . 1 . .
    C C3 0.9662(3) 0.08155(12) 0.86083(15) 0.0242(6) Uani d . 1 . .
    H H3 0.9152 0.0435 0.8683 0.029 Uiso calc R 1 . .
    C C4 1.1036(3) 0.08382(12) 0.88537(15) 0.0285(6) Uani d . 1 . .
    H H4 1.147 0.0478 0.9115 0.034 Uiso calc R 1 . .
    C C5 1.1813(3) 0.13873(12) 0.87242(15) 0.0246(6) Uani d . 1 . .
    H H5 1.2777 0.1392 0.8876 0.029 Uiso calc R 1 . .
    C C6 1.1177(2) 0.19216(12) 0.83755(14) 0.0201(5) Uani d . 1 . .
    H H6 1.1702 0.2296 0.8293 0.024 Uiso calc R 1 . .
    C C7 0.4682(2) 0.36477(11) 0.68895(14) 0.0208(5) Uani d . 1 . .
    C C8 0.3408(3) 0.35015(13) 0.72135(15) 0.0260(6) Uani d . 1 . .
    H H8 0.3309 0.3245 0.7669 0.031 Uiso calc R 1 . .
    C C9 0.2318(3) 0.38069(13) 0.67348(17) 0.0328(7) Uani d . 1 . .
    H H9 0.1366 0.3789 0.6814 0.039 Uiso calc R 1 . .
    C C10 0.2903(3) 0.41416(12) 0.61208(18) 0.0330(7) Uani d . 1 . .
    H H10 0.2408 0.4386 0.5715 0.04 Uiso calc R 1 . .
    C C11 0.4360(3) 0.40519(12) 0.62109(17) 0.0297(6) Uani d . 1 . .
    H H11 0.5002 0.4228 0.588 0.036 Uiso calc R 1 . .
    C C12 0.4190(2) 0.23122(11) 0.58854(13) 0.0165(5) Uani d . 1 . .
    C C13 0.2772(3) 0.22594(11) 0.60242(16) 0.0237(6) Uani d . 1 . .
    H H13 0.2419 0.2023 0.6441 0.028 Uiso calc R 1 . .
    C C14 0.1976(3) 0.26196(12) 0.54346(16) 0.0286(6) Uani d . 1 . .
    H H14 0.1 0.2663 0.5388 0.034 Uiso calc R 1 . .
    C C15 0.2876(3) 0.29004(12) 0.49336(15) 0.0286(6) Uani d . 1 . .
    H H15 0.2614 0.3167 0.4489 0.034 Uiso calc R 1 . .
    C C16 0.4247(3) 0.27194(12) 0.52019(14) 0.0230(6) Uani d . 1 . .
    H H16 0.5059 0.2845 0.4971 0.028 Uiso calc R 1 . .
    C C17 0.6514(2) 0.38981(11) 0.82117(14) 0.0181(5) Uani d . 1 . .
    C C18 0.5864(3) 0.45008(11) 0.81908(15) 0.0228(6) Uani d . 1 . .
    H H18 0.5348 0.4641 0.7718 0.027 Uiso calc R 1 . .
    C C19 0.5972(3) 0.48916(12) 0.88578(16) 0.0269(6) Uani d . 1 . .
    H H19 0.5543 0.5301 0.8836 0.032 Uiso calc R 1 . .
    C C20 0.6700(3) 0.46902(12) 0.95551(15) 0.0254(6) Uani d . 1 . .
    H H20 0.6768 0.4959 1.0011 0.03 Uiso calc R 1 . .
    C C21 0.7328(3) 0.40936(12) 0.95851(15) 0.0234(6) Uani d . 1 . .
    H H21 0.783 0.3954 1.0063 0.028 Uiso calc R 1 . .
    C C22 0.7229(2) 0.36964(11) 0.89165(14) 0.0198(5) Uani d . 1 . .
    H H22 0.7653 0.3286 0.8944 0.024 Uiso calc R 1 . .
    C C23 0.7524(2) 0.37802(11) 0.66609(14) 0.0187(5) Uani d . 1 . .
    C C24 0.8019(3) 0.44070(12) 0.67648(15) 0.0244(6) Uani d . 1 . .
    H H24 0.777 0.4654 0.7202 0.029 Uiso calc R 1 . .
    C C25 0.8867(3) 0.46699(13) 0.62368(17) 0.0324(7) Uani d . 1 . .
    H H25 0.9191 0.5098 0.6309 0.039 Uiso calc R 1 . .
    C C26 0.9245(3) 0.43106(13) 0.56045(16) 0.0303(6) Uani d . 1 . .
    H H26 0.9822 0.4494 0.5241 0.036 Uiso calc R 1 . .
    C C27 0.8790(3) 0.36879(13) 0.54975(15) 0.0264(6) Uani d . 1 . .
    H H27 0.9067 0.344 0.5068 0.032 Uiso calc R 1 . .
    C C28 0.7929(3) 0.34259(12) 0.60184(14) 0.0229(6) Uani d . 1 . .
    H H28 0.7607 0.2999 0.5939 0.028 Uiso calc R 1 . .
    C C29 0.4851(2) 0.11217(11) 0.65993(13) 0.0168(5) Uani d . 1 . .
    C C30 0.5235(3) 0.05791(11) 0.61909(15) 0.0220(5) Uani d . 1 . .
    H H30 0.5942 0.0609 0.5841 0.026 Uiso calc R 1 . .
    C C31 0.4589(3) -0.00040(12) 0.62940(16) 0.0292(6) Uani d . 1 . .
    H H31 0.4857 -0.0372 0.6014 0.035 Uiso calc R 1 . .
    C C32 0.3560(3) -0.00523(13) 0.68003(16) 0.0334(7) Uani d . 1 . .
    H H32 0.3099 -0.0449 0.6855 0.04 Uiso calc R 1 . .
    C C33 0.3200(3) 0.04740(12) 0.72255(16) 0.0307(6) Uani d . 1 . .
    H H33 0.2506 0.0439 0.7584 0.037 Uiso calc R 1 . .
    C C34 0.3852(3) 0.10576(12) 0.71310(14) 0.0222(6) Uani d . 1 . .
    H H34 0.3613 0.1418 0.7434 0.027 Uiso calc R 1 . .
    C C35 0.6801(2) 0.17417(10) 0.56896(14) 0.0174(5) Uani d . 1 . .
    C C36 0.8212(2) 0.16677(11) 0.59016(15) 0.0202(5) Uani d . 1 . .
    H H36 0.857 0.1727 0.6439 0.024 Uiso calc R 1 . .
    C C37 0.9095(3) 0.15087(11) 0.53322(15) 0.0234(6) Uani d . 1 . .
    H H37 1.0052 0.1456 0.5482 0.028 Uiso calc R 1 . .
    C C38 0.8584(3) 0.14266(11) 0.45439(16) 0.0247(6) Uani d . 1 . .
    H H38 0.9191 0.1323 0.4153 0.03 Uiso calc R 1 . .
    C C39 0.7191(3) 0.14964(11) 0.43306(15) 0.0227(6) Uani d . 1 . .
    H H39 0.6841 0.1441 0.3791 0.027 Uiso calc R 1 . .
    C C40 0.6302(3) 0.16465(11) 0.48939(14) 0.0204(5) Uani d . 1 . .
    H H40 0.5343 0.1686 0.474 0.024 Uiso calc R 1 . .
    C C41 0.5354(3) 0.23232(11) 0.81208(14) 0.0196(5) Uani d . 1 . .

loop_
    _atom_site_aniso_label
    _atom_site_aniso_U_11
    _atom_site_aniso_U_22
    _atom_site_aniso_U_33
    _atom_site_aniso_U_12
    _atom_site_aniso_U_13
    _atom_site_aniso_U_23
    Fe1 0.01554(18) 0.01192(17) 0.01651(17) -0.00052(13) -0.00170(13)
     -0.00074(13)
    Fe2 0.01665(19) 0.01423(18) 0.01817(18) 0.00073(13) -0.00273(14)
     -0.00197(14)
    S1 0.0163(3) 0.0134(3) 0.0242(3) -0.0003(2) -0.0015(2) 0.0009(2)
    S2 0.0201(3) 0.0138(3) 0.0235(3) -0.0014(2) -0.0052(3) 0.0019(2)
    P1 0.0172(3) 0.0123(3) 0.0177(3) -0.0001(2) -0.0029(2) -0.0010(2)
    P2 0.0148(3) 0.0128(3) 0.0155(3) -0.0006(2) 0.0003(2) -0.0013(2)
    O1 0.0301(11) 0.0300(11) 0.0315(10) -0.0057(8) 0.0111(9) -0.0059(8)
    C1 0.0205(13) 0.0159(12) 0.0172(12) 0.0031(10) -0.0009(10) -0.0023(10)
    C2 0.0212(13) 0.0186(12) 0.0175(12) 0.0014(10) -0.0034(10) -0.0030(10)
    C3 0.0259(14) 0.0163(13) 0.0291(14) 0.0000(10) -0.0042(11) 0.0016(11)
    C4 0.0320(16) 0.0223(14) 0.0295(15) 0.0078(12) -0.0066(12) 0.0023(11)
    C5 0.0211(14) 0.0277(15) 0.0237(14) 0.0052(11) -0.0042(11) -0.0034(11)
    C6 0.0184(13) 0.0198(13) 0.0219(13) -0.0024(10) 0.0011(10) -0.0024(10)
    C7 0.0234(14) 0.0124(12) 0.0248(13) 0.0028(10) -0.0074(11) -0.0063(10)
    C8 0.0238(14) 0.0319(15) 0.0214(14) 0.0057(11) -0.0027(11) -0.0112(11)
    C9 0.0251(15) 0.0357(17) 0.0357(16) 0.0106(12) -0.0078(12) -0.0195(13)
    C10 0.0309(16) 0.0138(13) 0.0499(18) 0.0063(11) -0.0210(14) -0.0090(12)
    C11 0.0327(16) 0.0154(13) 0.0379(16) -0.0047(11) -0.0135(13) 0.0034(11)
    C12 0.0183(13) 0.0128(12) 0.0176(12) 0.0011(9) -0.0023(10) -0.0046(9)
    C13 0.0202(13) 0.0165(13) 0.0335(15) -0.0034(10) -0.0023(11) -0.0003(11)
    C14 0.0218(14) 0.0203(13) 0.0408(16) 0.0003(11) -0.0131(12) -0.0072(12)
    C15 0.0416(17) 0.0230(14) 0.0189(13) 0.0091(12) -0.0104(12) -0.0035(11)
    C16 0.0282(14) 0.0232(14) 0.0178(13) 0.0055(11) 0.0027(11) 0.0000(10)
    C17 0.0174(13) 0.0153(12) 0.0214(13) -0.0042(10) 0.0003(10) -0.0019(10)
    C18 0.0268(14) 0.0173(13) 0.0235(13) -0.0015(10) -0.0018(11) -0.0013(10)
    C19 0.0311(15) 0.0177(13) 0.0321(15) -0.0001(11) 0.0034(12) -0.0046(11)
    C20 0.0279(15) 0.0244(14) 0.0240(14) -0.0062(11) 0.0028(11) -0.0088(11)
    C21 0.0244(14) 0.0252(14) 0.0200(13) -0.0040(11) -0.0014(11) -0.0014(11)
    C22 0.0182(13) 0.0177(13) 0.0230(13) -0.0020(10) -0.0007(10) -0.0002(10)
    C23 0.0180(13) 0.0167(13) 0.0201(13) 0.0009(10) -0.0050(10) 0.0024(10)
    C24 0.0257(14) 0.0210(14) 0.0260(14) -0.0002(11) 0.0002(11) -0.0009(11)
    C25 0.0312(16) 0.0229(14) 0.0427(17) -0.0049(12) 0.0016(13) 0.0063(13)
    C26 0.0221(14) 0.0352(16) 0.0335(16) 0.0013(12) 0.0030(12) 0.0155(13)
    C27 0.0269(15) 0.0302(15) 0.0215(14) 0.0088(11) -0.0015(11) 0.0040(11)
    C28 0.0258(14) 0.0198(13) 0.0221(13) 0.0014(11) -0.0042(11) 0.0015(10)
    C29 0.0201(13) 0.0121(11) 0.0171(12) -0.0023(9) -0.0035(10) 0.0006(9)
    C30 0.0252(14) 0.0178(13) 0.0225(13) 0.0002(10) -0.0001(11) -0.0007(10)
    C31 0.0434(17) 0.0150(13) 0.0297(15) -0.0030(11) 0.0064(13) -0.0035(11)
    C32 0.0520(19) 0.0197(14) 0.0291(15) -0.0158(13) 0.0069(14) -0.0023(12)
    C33 0.0395(17) 0.0278(15) 0.0262(15) -0.0126(12) 0.0105(13) -0.0039(12)
    C34 0.0281(14) 0.0194(13) 0.0189(13) -0.0037(11) 0.0006(11) -0.0027(10)
    C35 0.0212(13) 0.0110(11) 0.0207(13) -0.0019(9) 0.0051(10) -0.0026(10)
    C36 0.0211(14) 0.0158(12) 0.0238(13) -0.0011(10) 0.0028(11) -0.0030(10)
    C37 0.0210(14) 0.0156(12) 0.0344(15) -0.0005(10) 0.0077(11) -0.0003(11)
    C38 0.0320(15) 0.0145(13) 0.0300(15) 0.0009(11) 0.0158(12) 0.0013(11)
    C39 0.0342(15) 0.0151(12) 0.0194(13) 0.0001(11) 0.0054(11) -0.0015(10)
    C40 0.0234(14) 0.0147(12) 0.0230(13) -0.0020(10) 0.0025(11) 0.0001(10)
    C41 0.0245(14) 0.0121(12) 0.0209(13) -0.0015(10) -0.0043(11) -0.0028(10)

_geom_special_details                   
;
All esds (except the esd in the dihedral angle between two l.s. planes)
are estimated using the full covariance matrix.  The cell esds are taken
into account individually in the estimation of esds in distances, angles
and torsion angles; correlations between esds in cell parameters are only
used when they are defined by crystal symmetry.  An approximate (isotropic)
treatment of cell esds is used for estimating esds involving l.s. planes.
;

loop_
    _geom_bond_atom_site_label_1
    _geom_bond_atom_site_label_2
    _geom_bond_site_symmetry_2
    _geom_bond_distance
    _geom_bond_publ_flag
    Fe1 C41 . 1.732(3) ?
    Fe1 S1 . 2.1719(7) ?
    Fe1 P2 . 2.2241(7) ?
    Fe1 S2 . 2.2243(7) ?
    Fe1 P1 . 2.2405(7) ?
    Fe2 C16 . 2.020(2) ?
    Fe2 C7 . 2.021(2) ?
    Fe2 C8 . 2.027(2) ?
    Fe2 C13 . 2.032(2) ?
    Fe2 C12 . 2.033(2) ?
    Fe2 C11 . 2.034(2) ?
    Fe2 C15 . 2.036(2) ?
    Fe2 C10 . 2.038(2) ?
    Fe2 C9 . 2.042(3) ?
    Fe2 C14 . 2.047(2) ?
    S1 C1 . 1.745(2) ?
    S2 C2 . 1.735(2) ?
    P1 C7 . 1.813(2) ?
    P1 C23 . 1.833(2) ?
    P1 C17 . 1.846(2) ?
    P2 C12 . 1.827(2) ?
    P2 C35 . 1.836(2) ?
    P2 C29 . 1.844(2) ?
    O1 C41 . 1.162(3) ?
    C1 C6 . 1.398(3) ?
    C1 C2 . 1.404(3) ?
    C2 C3 . 1.410(3) ?
    C3 C4 . 1.365(3) ?
    C3 H3 . 0.95 ?
    C4 C5 . 1.401(4) ?
    C4 H4 . 0.95 ?
    C5 C6 . 1.380(3) ?
    C5 H5 . 0.95 ?
    C6 H6 . 0.95 ?
    C7 C8 . 1.433(4) ?
    C7 C11 . 1.434(3) ?
    C8 C9 . 1.424(4) ?
    C8 H8 . 0.95 ?
    C9 C10 . 1.413(4) ?
    C9 H9 . 0.95 ?
    C10 C11 . 1.424(4) ?
    C10 H10 . 0.95 ?
    C11 H11 . 0.95 ?
    C12 C13 . 1.426(3) ?
    C12 C16 . 1.438(3) ?
    C13 C14 . 1.419(4) ?
    C13 H13 . 0.95 ?
    C14 C15 . 1.401(4) ?
    C14 H14 . 0.95 ?
    C15 C16 . 1.421(4) ?
    C15 H15 . 0.95 ?
    C16 H16 . 0.95 ?
    C17 C22 . 1.388(3) ?
    C17 C18 . 1.406(3) ?
    C18 C19 . 1.386(3) ?
    C18 H18 . 0.95 ?
    C19 C20 . 1.383(4) ?
    C19 H19 . 0.95 ?
    C20 C21 . 1.385(4) ?
    C20 H20 . 0.95 ?
    C21 C22 . 1.397(3) ?
    C21 H21 . 0.95 ?
    C22 H22 . 0.95 ?
    C23 C24 . 1.399(3) ?
    C23 C28 . 1.399(3) ?
    C24 C25 . 1.383(4) ?
    C24 H24 . 0.95 ?
    C25 C26 . 1.381(4) ?
    C25 H25 . 0.95 ?
    C26 C27 . 1.378(4) ?
    C26 H26 . 0.95 ?
    C27 C28 . 1.382(4) ?
    C27 H27 . 0.95 ?
    C28 H28 . 0.95 ?
    C29 C34 . 1.389(3) ?
    C29 C30 . 1.394(3) ?
    C30 C31 . 1.388(3) ?
    C30 H30 . 0.95 ?
    C31 C32 . 1.380(4) ?
    C31 H31 . 0.95 ?
    C32 C33 . 1.374(4) ?
    C32 H32 . 0.95 ?
    C33 C34 . 1.389(3) ?
    C33 H33 . 0.95 ?
    C34 H34 . 0.95 ?
    C35 C36 . 1.397(3) ?
    C35 C40 . 1.400(3) ?
    C36 C37 . 1.387(3) ?
    C36 H36 . 0.95 ?
    C37 C38 . 1.388(4) ?
    C37 H37 . 0.95 ?
    C38 C39 . 1.379(4) ?
    C38 H38 . 0.95 ?
    C39 C40 . 1.380(3) ?
    C39 H39 . 0.95 ?
    C40 H40 . 0.95 ?

loop_
    _geom_angle_atom_site_label_1
    _geom_angle_atom_site_label_2
    _geom_angle_atom_site_label_3
    _geom_angle_site_symmetry_1
    _geom_angle_site_symmetry_3
    _geom_angle
    _geom_angle_publ_flag
    C41 Fe1 S1 . . 134.57(8) ?
    C41 Fe1 P2 . . 96.69(8) ?
    S1 Fe1 P2 . . 128.48(3) ?
    C41 Fe1 S2 . . 88.52(8) ?
    S1 Fe1 S2 . . 89.21(2) ?
    P2 Fe1 S2 . . 87.07(2) ?
    C41 Fe1 P1 . . 90.19(8) ?
    S1 Fe1 P1 . . 85.90(2) ?
    P2 Fe1 P1 . . 101.18(2) ?
    S2 Fe1 P1 . . 171.74(3) ?
    C16 Fe2 C7 . . 116.63(10) ?
    C16 Fe2 C8 . . 151.31(10) ?
    C7 Fe2 C8 . . 41.47(10) ?
    C16 Fe2 C13 . . 69.07(11) ?
    C7 Fe2 C13 . . 129.85(10) ?
    C8 Fe2 C13 . . 108.84(11) ?
    C16 Fe2 C12 . . 41.55(9) ?
    C7 Fe2 C12 . . 107.65(9) ?
    C8 Fe2 C12 . . 117.70(10) ?
    C13 Fe2 C12 . . 41.08(10) ?
    C16 Fe2 C11 . . 106.84(12) ?
    C7 Fe2 C11 . . 41.41(10) ?
    C8 Fe2 C11 . . 69.28(12) ?
    C13 Fe2 C11 . . 168.55(10) ?
    C12 Fe2 C11 . . 128.95(10) ?
    C16 Fe2 C15 . . 41.01(10) ?
    C7 Fe2 C15 . . 150.04(11) ?
    C8 Fe2 C15 . . 166.85(11) ?
    C13 Fe2 C15 . . 68.34(11) ?
    C12 Fe2 C15 . . 69.25(10) ?
    C11 Fe2 C15 . . 116.11(11) ?
    C16 Fe2 C10 . . 127.88(12) ?
    C7 Fe2 C10 . . 69.35(10) ?
    C8 Fe2 C10 . . 68.71(11) ?
    C13 Fe2 C10 . . 149.89(11) ?
    C12 Fe2 C10 . . 167.42(11) ?
    C11 Fe2 C10 . . 40.95(10) ?
    C15 Fe2 C10 . . 106.88(11) ?
    C16 Fe2 C9 . . 166.15(11) ?
    C7 Fe2 C9 . . 69.51(10) ?
    C8 Fe2 C9 . . 40.97(10) ?
    C13 Fe2 C9 . . 117.60(12) ?
    C12 Fe2 C9 . . 151.10(11) ?
    C11 Fe2 C9 . . 68.90(12) ?
    C15 Fe2 C9 . . 127.85(10) ?
    C10 Fe2 C9 . . 40.52(12) ?
    C16 Fe2 C14 . . 68.57(11) ?
    C7 Fe2 C14 . . 168.66(11) ?
    C8 Fe2 C14 . . 129.54(11) ?
    C13 Fe2 C14 . . 40.72(10) ?
    C12 Fe2 C14 . . 68.99(10) ?
    C11 Fe2 C14 . . 149.00(10) ?
    C15 Fe2 C14 . . 40.13(11) ?
    C10 Fe2 C14 . . 116.31(10) ?
    C9 Fe2 C14 . . 107.87(11) ?
    C1 S1 Fe1 . . 107.09(8) ?
    C2 S2 Fe1 . . 105.67(8) ?
    C7 P1 C23 . . 102.50(11) ?
    C7 P1 C17 . . 98.74(11) ?
    C23 P1 C17 . . 103.60(11) ?
    C7 P1 Fe1 . . 118.60(8) ?
    C23 P1 Fe1 . . 116.15(8) ?
    C17 P1 Fe1 . . 114.72(8) ?
    C12 P2 C35 . . 102.34(11) ?
    C12 P2 C29 . . 99.85(10) ?
    C35 P2 C29 . . 101.94(10) ?
    C12 P2 Fe1 . . 122.70(7) ?
    C35 P2 Fe1 . . 112.09(8) ?
    C29 P2 Fe1 . . 115.16(7) ?
    C6 C1 C2 . . 119.8(2) ?
    C6 C1 S1 . . 121.63(18) ?
    C2 C1 S1 . . 118.57(18) ?
    C1 C2 C3 . . 119.2(2) ?
    C1 C2 S2 . . 119.23(18) ?
    C3 C2 S2 . . 121.58(19) ?
    C4 C3 C2 . . 120.2(2) ?
    C4 C3 H3 . . 119.9 ?
    C2 C3 H3 . . 119.9 ?
    C3 C4 C5 . . 120.7(2) ?
    C3 C4 H4 . . 119.7 ?
    C5 C4 H4 . . 119.7 ?
    C6 C5 C4 . . 119.9(2) ?
    C6 C5 H5 . . 120.1 ?
    C4 C5 H5 . . 120.1 ?
    C5 C6 C1 . . 120.2(2) ?
    C5 C6 H6 . . 119.9 ?
    C1 C6 H6 . . 119.9 ?
    C8 C7 C11 . . 107.3(2) ?
    C8 C7 P1 . . 124.90(19) ?
    C11 C7 P1 . . 127.8(2) ?
    C8 C7 Fe2 . . 69.49(13) ?
    C11 C7 Fe2 . . 69.81(14) ?
    P1 C7 Fe2 . . 128.20(12) ?
    C9 C8 C7 . . 108.3(2) ?
    C9 C8 Fe2 . . 70.10(15) ?
    C7 C8 Fe2 . . 69.04(14) ?
    C9 C8 H8 . . 125.8 ?
    C7 C8 H8 . . 125.8 ?
    Fe2 C8 H8 . . 126.6 ?
    C10 C9 C8 . . 107.9(2) ?
    C10 C9 Fe2 . . 69.56(15) ?
    C8 C9 Fe2 . . 68.93(14) ?
    C10 C9 H9 . . 126.0 ?
    C8 C9 H9 . . 126.0 ?
    Fe2 C9 H9 . . 127.0 ?
    C9 C10 C11 . . 108.8(2) ?
    C9 C10 Fe2 . . 69.92(15) ?
    C11 C10 Fe2 . . 69.41(14) ?
    C9 C10 H10 . . 125.6 ?
    C11 C10 H10 . . 125.6 ?
    Fe2 C10 H10 . . 126.6 ?
    C10 C11 C7 . . 107.8(3) ?
    C10 C11 Fe2 . . 69.64(14) ?
    C7 C11 Fe2 . . 68.78(14) ?
    C10 C11 H11 . . 126.1 ?
    C7 C11 H11 . . 126.1 ?
    Fe2 C11 H11 . . 127.0 ?
    C13 C12 C16 . . 106.7(2) ?
    C13 C12 P2 . . 125.92(18) ?
    C16 C12 P2 . . 127.39(18) ?
    C13 C12 Fe2 . . 69.42(13) ?
    C16 C12 Fe2 . . 68.74(13) ?
    P2 C12 Fe2 . . 128.14(12) ?
    C14 C13 C12 . . 108.6(2) ?
    C14 C13 Fe2 . . 70.20(14) ?
    C12 C13 Fe2 . . 69.50(13) ?
    C14 C13 H13 . . 125.7 ?
    C12 C13 H13 . . 125.7 ?
    Fe2 C13 H13 . . 126.2 ?
    C15 C14 C13 . . 108.2(2) ?
    C15 C14 Fe2 . . 69.53(15) ?
    C13 C14 Fe2 . . 69.08(14) ?
    C15 C14 H14 . . 125.9 ?
    C13 C14 H14 . . 125.9 ?
    Fe2 C14 H14 . . 127.1 ?
    C14 C15 C16 . . 108.6(2) ?
    C14 C15 Fe2 . . 70.34(15) ?
    C16 C15 Fe2 . . 68.88(14) ?
    C14 C15 H15 . . 125.7 ?
    C16 C15 H15 . . 125.7 ?
    Fe2 C15 H15 . . 126.6 ?
    C15 C16 C12 . . 108.0(2) ?
    C15 C16 Fe2 . . 70.11(14) ?
    C12 C16 Fe2 . . 69.71(13) ?
    C15 C16 H16 . . 126.0 ?
    C12 C16 H16 . . 126.0 ?
    Fe2 C16 H16 . . 125.7 ?
    C22 C17 C18 . . 118.8(2) ?
    C22 C17 P1 . . 121.74(18) ?
    C18 C17 P1 . . 119.46(18) ?
    C19 C18 C17 . . 120.3(2) ?
    C19 C18 H18 . . 119.8 ?
    C17 C18 H18 . . 119.8 ?
    C20 C19 C18 . . 120.5(2) ?
    C20 C19 H19 . . 119.7 ?
    C18 C19 H19 . . 119.7 ?
    C19 C20 C21 . . 119.6(2) ?
    C19 C20 H20 . . 120.2 ?
    C21 C20 H20 . . 120.2 ?
    C20 C21 C22 . . 120.4(2) ?
    C20 C21 H21 . . 119.8 ?
    C22 C21 H21 . . 119.8 ?
    C17 C22 C21 . . 120.4(2) ?
    C17 C22 H22 . . 119.8 ?
    C21 C22 H22 . . 119.8 ?
    C24 C23 C28 . . 118.2(2) ?
    C24 C23 P1 . . 124.21(19) ?
    C28 C23 P1 . . 117.59(18) ?
    C25 C24 C23 . . 120.6(2) ?
    C25 C24 H24 . . 119.7 ?
    C23 C24 H24 . . 119.7 ?
    C26 C25 C24 . . 120.0(3) ?
    C26 C25 H25 . . 120.0 ?
    C24 C25 H25 . . 120.0 ?
    C27 C26 C25 . . 120.5(3) ?
    C27 C26 H26 . . 119.8 ?
    C25 C26 H26 . . 119.8 ?
    C26 C27 C28 . . 119.7(2) ?
    C26 C27 H27 . . 120.2 ?
    C28 C27 H27 . . 120.2 ?
    C27 C28 C23 . . 121.0(2) ?
    C27 C28 H28 . . 119.5 ?
    C23 C28 H28 . . 119.5 ?
    C34 C29 C30 . . 118.5(2) ?
    C34 C29 P2 . . 119.50(18) ?
    C30 C29 P2 . . 122.00(19) ?
    C31 C30 C29 . . 120.3(2) ?
    C31 C30 H30 . . 119.9 ?
    C29 C30 H30 . . 119.9 ?
    C32 C31 C30 . . 120.4(2) ?
    C32 C31 H31 . . 119.8 ?
    C30 C31 H31 . . 119.8 ?
    C33 C32 C31 . . 120.0(2) ?
    C33 C32 H32 . . 120.0 ?
    C31 C32 H32 . . 120.0 ?
    C32 C33 C34 . . 119.9(3) ?
    C32 C33 H33 . . 120.0 ?
    C34 C33 H33 . . 120.0 ?
    C33 C34 C29 . . 120.9(2) ?
    C33 C34 H34 . . 119.6 ?
    C29 C34 H34 . . 119.6 ?
    C36 C35 C40 . . 118.5(2) ?
    C36 C35 P2 . . 120.05(18) ?
    C40 C35 P2 . . 121.41(18) ?
    C37 C36 C35 . . 120.4(2) ?
    C37 C36 H36 . . 119.8 ?
    C35 C36 H36 . . 119.8 ?
    C36 C37 C38 . . 120.3(2) ?
    C36 C37 H37 . . 119.9 ?
    C38 C37 H37 . . 119.9 ?
    C39 C38 C37 . . 119.6(2) ?
    C39 C38 H38 . . 120.2 ?
    C37 C38 H38 . . 120.2 ?
    C38 C39 C40 . . 120.6(2) ?
    C38 C39 H39 . . 119.7 ?
    C40 C39 H39 . . 119.7 ?
    C39 C40 C35 . . 120.6(2) ?
    C39 C40 H40 . . 119.7 ?
    C35 C40 H40 . . 119.7 ?
    O1 C41 Fe1 . . 173.4(2) ?

 
_iucr_refine_instructions_details
;
TITL P21n in P2(1)/n
CELL 0.71073 9.7375 20.8536 16.8851 90.000 95.268 90.000
ZERR 4.00 0.0006 0.0013 0.0011 0.000 0.001 0.000
LATT 1
SYMM -x+1/2, y+1/2, -z+1/2
SFAC C  H  O  P  S  Fe
UNIT 164  128  4  8  8  8
L.S. 4
SHEL 999 0.83
ACTA
BOND $H
FMAP 2
PLAN -3
SIZE 0.045 0.147 0.360
TEMP -150.100
WGHT    0.031400    1.672700
FVAR       0.08028
FE1   6    0.673162    0.234302    0.754099    11.00000    0.01554    0.01192 =
         0.01651   -0.00074   -0.00170   -0.00052
FE2   6    0.338039    0.319179    0.607433    11.00000    0.01665    0.01423 =
         0.01817   -0.00197   -0.00273    0.00073
S1    5    0.889830    0.259418    0.775644    11.00000    0.01631    0.01337 =
         0.02421    0.00085   -0.00149   -0.00027
S2    5    0.724695    0.134684    0.793447    11.00000    0.02013    0.01383 =
         0.02345    0.00193   -0.00520   -0.00144
P1    4    0.637043    0.339054    0.731215    11.00000    0.01719    0.01229 =
         0.01770   -0.00104   -0.00285   -0.00009
P2    4    0.563093    0.191406    0.645565    11.00000    0.01483    0.01282 =
         0.01551   -0.00133    0.00030   -0.00064
O1    3    0.452430    0.230526    0.857294    11.00000    0.03008    0.03002 =
         0.03151   -0.00589    0.01113   -0.00574
C1    1    0.976172    0.191399    0.814350    11.00000    0.02052    0.01593 =
         0.01716   -0.00229   -0.00091    0.00311
C2    1    0.899604    0.135418    0.824409    11.00000    0.02124    0.01856 =
         0.01753   -0.00295   -0.00338    0.00141
C3    1    0.966173    0.081546    0.860833    11.00000    0.02593    0.01629 =
         0.02913    0.00157   -0.00423   -0.00003
AFIX  43
H3    2    0.915197    0.043528    0.868330    11.00000   -1.20000
AFIX   0
C4    1    1.103600    0.083817    0.885365    11.00000    0.03199    0.02229 =
         0.02954    0.00229   -0.00664    0.00780
AFIX  43
H4    2    1.146964    0.047804    0.911475    11.00000   -1.20000
AFIX   0
C5    1    1.181342    0.138727    0.872424    11.00000    0.02109    0.02769 =
         0.02371   -0.00335   -0.00421    0.00518
AFIX  43
H5    2    1.277721    0.139191    0.887627    11.00000   -1.20000
AFIX   0
C6    1    1.117696    0.192160    0.837550    11.00000    0.01837    0.01984 =
         0.02190   -0.00241    0.00108   -0.00241
AFIX  43
H6    2    1.170235    0.229558    0.829293    11.00000   -1.20000
AFIX   0
C7    1    0.468158    0.364768    0.688945    11.00000    0.02339    0.01238 =
         0.02482   -0.00634   -0.00737    0.00277
C8    1    0.340831    0.350150    0.721346    11.00000    0.02377    0.03191 =
         0.02143   -0.01116   -0.00269    0.00574
AFIX  43
H8    2    0.330865    0.324485    0.766948    11.00000   -1.20000
AFIX   0
C9    1    0.231797    0.380685    0.673477    11.00000    0.02511    0.03569 =
         0.03567   -0.01951   -0.00780    0.01063
AFIX  43
H9    2    0.136553    0.378864    0.681431    11.00000   -1.20000
AFIX   0
C10   1    0.290337    0.414161    0.612075    11.00000    0.03086    0.01384 =
         0.04987   -0.00898   -0.02099    0.00630
AFIX  43
H10   2    0.240764    0.438620    0.571469    11.00000   -1.20000
AFIX   0
C11   1    0.435951    0.405192    0.621088    11.00000    0.03274    0.01541 =
         0.03791    0.00339   -0.01352   -0.00466
AFIX  43
H11   2    0.500228    0.422838    0.588049    11.00000   -1.20000
AFIX   0
C12   1    0.419037    0.231222    0.588537    11.00000    0.01831    0.01284 =
         0.01761   -0.00455   -0.00230    0.00114
C13   1    0.277179    0.225938    0.602419    11.00000    0.02022    0.01650 =
         0.03351   -0.00034   -0.00226   -0.00343
AFIX  43
H13   2    0.241888    0.202269    0.644143    11.00000   -1.20000
AFIX   0
C14   1    0.197574    0.261962    0.543457    11.00000    0.02182    0.02027 =
         0.04077   -0.00725   -0.01313    0.00026
AFIX  43
H14   2    0.100046    0.266291    0.538771    11.00000   -1.20000
AFIX   0
C15   1    0.287596    0.290036    0.493356    11.00000    0.04156    0.02302 =
         0.01892   -0.00354   -0.01040    0.00913
AFIX  43
H15   2    0.261370    0.316696    0.448903    11.00000   -1.20000
AFIX   0
C16   1    0.424727    0.271939    0.520194    11.00000    0.02816    0.02319 =
         0.01784   -0.00003    0.00267    0.00545
AFIX  43
H16   2    0.505866    0.284526    0.497055    11.00000   -1.20000
AFIX   0
C17   1    0.651421    0.389806    0.821168    11.00000    0.01742    0.01530 =
         0.02141   -0.00194    0.00033   -0.00423
C18   1    0.586367    0.450076    0.819083    11.00000    0.02681    0.01725 =
         0.02348   -0.00128   -0.00175   -0.00147
AFIX  43
H18   2    0.534765    0.464066    0.771754    11.00000   -1.20000
AFIX   0
C19   1    0.597201    0.489162    0.885779    11.00000    0.03106    0.01771 =
         0.03212   -0.00456    0.00342   -0.00007
AFIX  43
H19   2    0.554283    0.530114    0.883552    11.00000   -1.20000
AFIX   0
C20   1    0.669970    0.469020    0.955515    11.00000    0.02790    0.02438 =
         0.02402   -0.00884    0.00282   -0.00623
AFIX  43
H20   2    0.676829    0.495932    1.001102    11.00000   -1.20000
AFIX   0
C21   1    0.732818    0.409362    0.958512    11.00000    0.02436    0.02524 =
         0.02003   -0.00139   -0.00137   -0.00403
AFIX  43
H21   2    0.782954    0.395395    1.006322    11.00000   -1.20000
AFIX   0
C22   1    0.722884    0.369637    0.891645    11.00000    0.01822    0.01772 =
         0.02297   -0.00025   -0.00067   -0.00199
AFIX  43
H22   2    0.765296    0.328573    0.894429    11.00000   -1.20000
AFIX   0
C23   1    0.752394    0.378023    0.666086    11.00000    0.01800    0.01672 =
         0.02010    0.00243   -0.00504    0.00089
C24   1    0.801891    0.440704    0.676481    11.00000    0.02570    0.02105 =
         0.02604   -0.00092    0.00017   -0.00017
AFIX  43
H24   2    0.777017    0.465445    0.720195    11.00000   -1.20000
AFIX   0
C25   1    0.886730    0.466989    0.623681    11.00000    0.03123    0.02293 =
         0.04273    0.00627    0.00156   -0.00488
AFIX  43
H25   2    0.919061    0.509761    0.630902    11.00000   -1.20000
AFIX   0
C26   1    0.924462    0.431062    0.560451    11.00000    0.02207    0.03525 =
         0.03353    0.01545    0.00304    0.00126
AFIX  43
H26   2    0.982156    0.449405    0.524077    11.00000   -1.20000
AFIX   0
C27   1    0.879012    0.368790    0.549747    11.00000    0.02687    0.03015 =
         0.02151    0.00402   -0.00155    0.00885
AFIX  43
H27   2    0.906749    0.343998    0.506783    11.00000   -1.20000
AFIX   0
C28   1    0.792876    0.342593    0.601837    11.00000    0.02578    0.01981 =
         0.02208    0.00151   -0.00419    0.00137
AFIX  43
H28   2    0.760676    0.299867    0.593876    11.00000   -1.20000
AFIX   0
C29   1    0.485108    0.112169    0.659928    11.00000    0.02009    0.01208 =
         0.01714    0.00061   -0.00355   -0.00233
C30   1    0.523520    0.057912    0.619095    11.00000    0.02522    0.01783 =
         0.02249   -0.00075   -0.00006    0.00018
AFIX  43
H30   2    0.594233    0.060871    0.584068    11.00000   -1.20000
AFIX   0
C31   1    0.458897   -0.000404    0.629398    11.00000    0.04343    0.01495 =
         0.02968   -0.00347    0.00636   -0.00302
AFIX  43
H31   2    0.485681   -0.037205    0.601436    11.00000   -1.20000
AFIX   0
C32   1    0.355955   -0.005229    0.680033    11.00000    0.05202    0.01969 =
         0.02914   -0.00233    0.00694   -0.01583
AFIX  43
H32   2    0.309929   -0.044931    0.685510    11.00000   -1.20000
AFIX   0
C33   1    0.319990    0.047403    0.722551    11.00000    0.03953    0.02777 =
         0.02619   -0.00386    0.01051   -0.01265
AFIX  43
H33   2    0.250595    0.043870    0.758353    11.00000   -1.20000
AFIX   0
C34   1    0.385243    0.105765    0.713105    11.00000    0.02807    0.01937 =
         0.01885   -0.00274    0.00059   -0.00372
AFIX  43
H34   2    0.361266    0.141784    0.743410    11.00000   -1.20000
AFIX   0
C35   1    0.680064    0.174165    0.568964    11.00000    0.02121    0.01101 =
         0.02065   -0.00259    0.00512   -0.00190
C36   1    0.821235    0.166774    0.590163    11.00000    0.02108    0.01583 =
         0.02380   -0.00299    0.00283   -0.00108
AFIX  43
H36   2    0.857048    0.172677    0.643918    11.00000   -1.20000
AFIX   0
C37   1    0.909467    0.150869    0.533223    11.00000    0.02100    0.01562 =
         0.03441   -0.00028    0.00769   -0.00047
AFIX  43
H37   2    1.005223    0.145574    0.548241    11.00000   -1.20000
AFIX   0
C38   1    0.858418    0.142660    0.454393    11.00000    0.03201    0.01454 =
         0.03001    0.00132    0.01584    0.00091
AFIX  43
H38   2    0.919132    0.132290    0.415349    11.00000   -1.20000
AFIX   0
C39   1    0.719138    0.149635    0.433060    11.00000    0.03421    0.01509 =
         0.01936   -0.00151    0.00543    0.00007
AFIX  43
H39   2    0.684086    0.144054    0.379119    11.00000   -1.20000
AFIX   0
C40   1    0.630233    0.164653    0.489392    11.00000    0.02342    0.01471 =
         0.02301    0.00012    0.00254   -0.00203
AFIX  43
H40   2    0.534275    0.168578    0.474040    11.00000   -1.20000
AFIX   0
C41   1    0.535394    0.232322    0.812084    11.00000    0.02452    0.01212 =
         0.02086   -0.00283   -0.00428   -0.00153
HKLF 4 1 1 0 0 0 1 0 0 0 1
 
REM  P21n in P2(1)/n
REM R1 =  0.0296 for   4982 Fo > 4sig(Fo)  and  0.0460 for all   6255 data
REM    433 parameters refined using      0 restraints
 
END  
     
WGHT      0.0314      1.6728 
REM Highest difference peak  0.443,  deepest hole -0.303,  1-sigma level  0.062
Q1    1   0.6162  0.2391  0.8066  11.00000  0.05    0.44
Q2    1   0.6257  0.1875  0.5970  11.00000  0.05    0.43
Q3    1   0.5973  0.2107  0.7857  11.00000  0.05    0.38
;
